# Supplementary material for: LARP4 mRNA codon-tRNA match contributes to LARP4 activity for ribosomal protein mRNA poly(A) tail length protection
Source: eLife journal article supplement (doi:10.7554/elife.28889), 2017-09-12
Supplement: supp [file elife-28889-supp-v1.zip]

Archive with 5 entries (5 files):
- elife_poa_e28889_Figure_6_Supplement_1.pdf
- elife_poa_e28889_Supplementary_File_1.docx
- elife_poa_e28889_Figure_3_supplement_2.tif
- elife_poa_e28889_Transparent_Reporting_File.docx
- elife_poa_e28889_Figure_3_Supplement_1.pdf
