# Supplementary material for: LARP4 mRNA codon-tRNA match contributes to LARP4 activity for ribosomal protein mRNA poly(A) tail length protection
Source: eLife journal article supplement (doi:10.7554/elife.28889), 2017-09-12
Supplement: supp [file elife-28889-supp-v1.zip › elife_poa_e28889_Figure_3_Supplement_1.pdf]

## Figure 3-supplement 1. Mattijssen et al.

### LARP4 CRD CS sequences:

#### WT

TCTAGTATCTATAGTCACCCCATTCAAACTCAAGCACAGTATGCCTCCCCAGTCTTTATGCAGCCTGTATATAATCCTCACCAACAGTACTCGGTCTATAGTATTGTGCCTC  
AGTCTTGGTCTCCAAATCCTACACCTTACTTTGAAACACCACTGGCTCCCTTTCCCAATGGTAGTTTTGTGAATGGCTTTAATTCGCCAGGATCTTATAAA

#### CS-R

TCATCAATTTACTCACATCCAATCCAGACGCAGGCTCAGTACGCAAGCCCGGTATTCATGCAACCGGTCTACAACCCGCATCAGCAGTACTCAGTATATTCAATAGTACCGC  
AATCATGGTCACCTAACCCGACGCCGTATTTTCGAGACGCCGCTTGCACCGTTCCCGAACGGGTCATTCGTCAACGGATTCAACAGCCCTGGTAGTTACAAG

#### CS-B

TCTTCTATTTATTCTCACCCGATTTCAGACTCAGGCACAGTATGCATCTCCGGTTTTTCATGCAGCCGGTTTTATAACCCGCACCAGCAGTATTCTGTTTATTCTATTGTTCCGC  
AGTCTTGGTCTCCGAACCCGACTCCGTATTTTCGAGACTCCGCTGGCACCGTTCCCGAACGGCTCTTTCGTTAACGGCTTCAACTCTCCGGGCTCTTATAAG

#### CS-I

TCTAGTATCTATAGTCACCCCATTCAAACTCAAGCACAGTATGCCTCCCCAGTCTTTATGCAGCCTGTATATAATCCTCACCAACAGTACTCGGTCTATAGTATTGTGCCTC  
AGTCTTGGTCTCCGAACCCGACTCCGTATTTTCGAGACTCCGCTGGCACCGTTCCCGAACGGCTCTTTCGTTAACGGCTTCAACTCTCCGGGCTCTTATAAG

#### CS-W

TCATCAATCTACTCACATCCCATCCAAACACAAGCCCAATACGCCTCACCCGTATTTATGCAACCCGTATACAATCCCCATCAACAATACTCAGTATACTCAATCGTACCCC  
AATCATGGTCACCCAATCCCACACCCTACTTTGAAACACCCCTCGCCCCCTTTCCCAATGGATCATTTGTAAATGGATTTAATTCACCCGGATCATACAAA

#### CSb

TCTAGCATCTACAGCCACCCCATTCAAACTCAAGCACAGTACGCCTCCCCAGTCTTCATGCAGCCTGTATACAATCCTCACCAACAGTACTCGGTCTACAGCATTGTGCCTC  
AGTCTTGGTCTCCAAATCCTACACCTTACTTCGAAACACCACTGGCTCCCTTCCCAATGGTAGCTTCGTGAATGGCTTCAATTCGCCAGGATCTTACAAA

#### CSc

TCTAGTATATATAGTCACCCGATACAAACTCAAGCACAGTATGCCTCCCCAGTCTTTATGCAGCCGGTATATAATCCGCACCAACAGTACTCGGTCTATAGTATAGTGCCGC  
AGTCTTGGTCTCCAAATCCGACTCCGTACTTTGAAACTCCACTGGCTCCGTTTCCGAATGGTAGTTTTGTGAATGGCTTTAATTCGCCAGGATCTTATAAA

#### CS-Tyr

TCTTCTATTTACTCTCACCCGATTTCAGACTCAGGCACAGTACGCATCTCCGGTTTTTCATGCAGCCGGTTTTACAACCCGCACCAGCAGTACTCTGTTTACTCTATTGTTCCGC  
AGTCTTGGTCTCCGAACCCGACTCCGTACTTCGAGACTCCGCTGGCACCGTTCCCGAACGGCTCTTTCGTTAACGGCTTCAACTCTCCGGGCTCTTACAAG

#### CSa

TCTAGCATCTACAGCCACCCCATTCAAACTCAAGCACAGTACGCCTCCCCAGTCTTCATGCAGCCTGTATACAACCCCTCACCAACAGTACTCGGTCTACAGCATTGTGCCTC  
AGTCTTGGTCTCCAAACCCCTACACCTTACTTCGAAACACCACTGGCTCCCTTCCCAACGGTAGCTTCGTGAACGGCTTCAACTCGCCAGGATCTTACAAA
