# Supplementary figures and images for: LARP4 mRNA codon-tRNA match contributes to LARP4 activity for ribosomal protein mRNA poly(A) tail length protection
Source: eLife journal article supplement (doi:10.7554/elife.28889), 2017-09-12

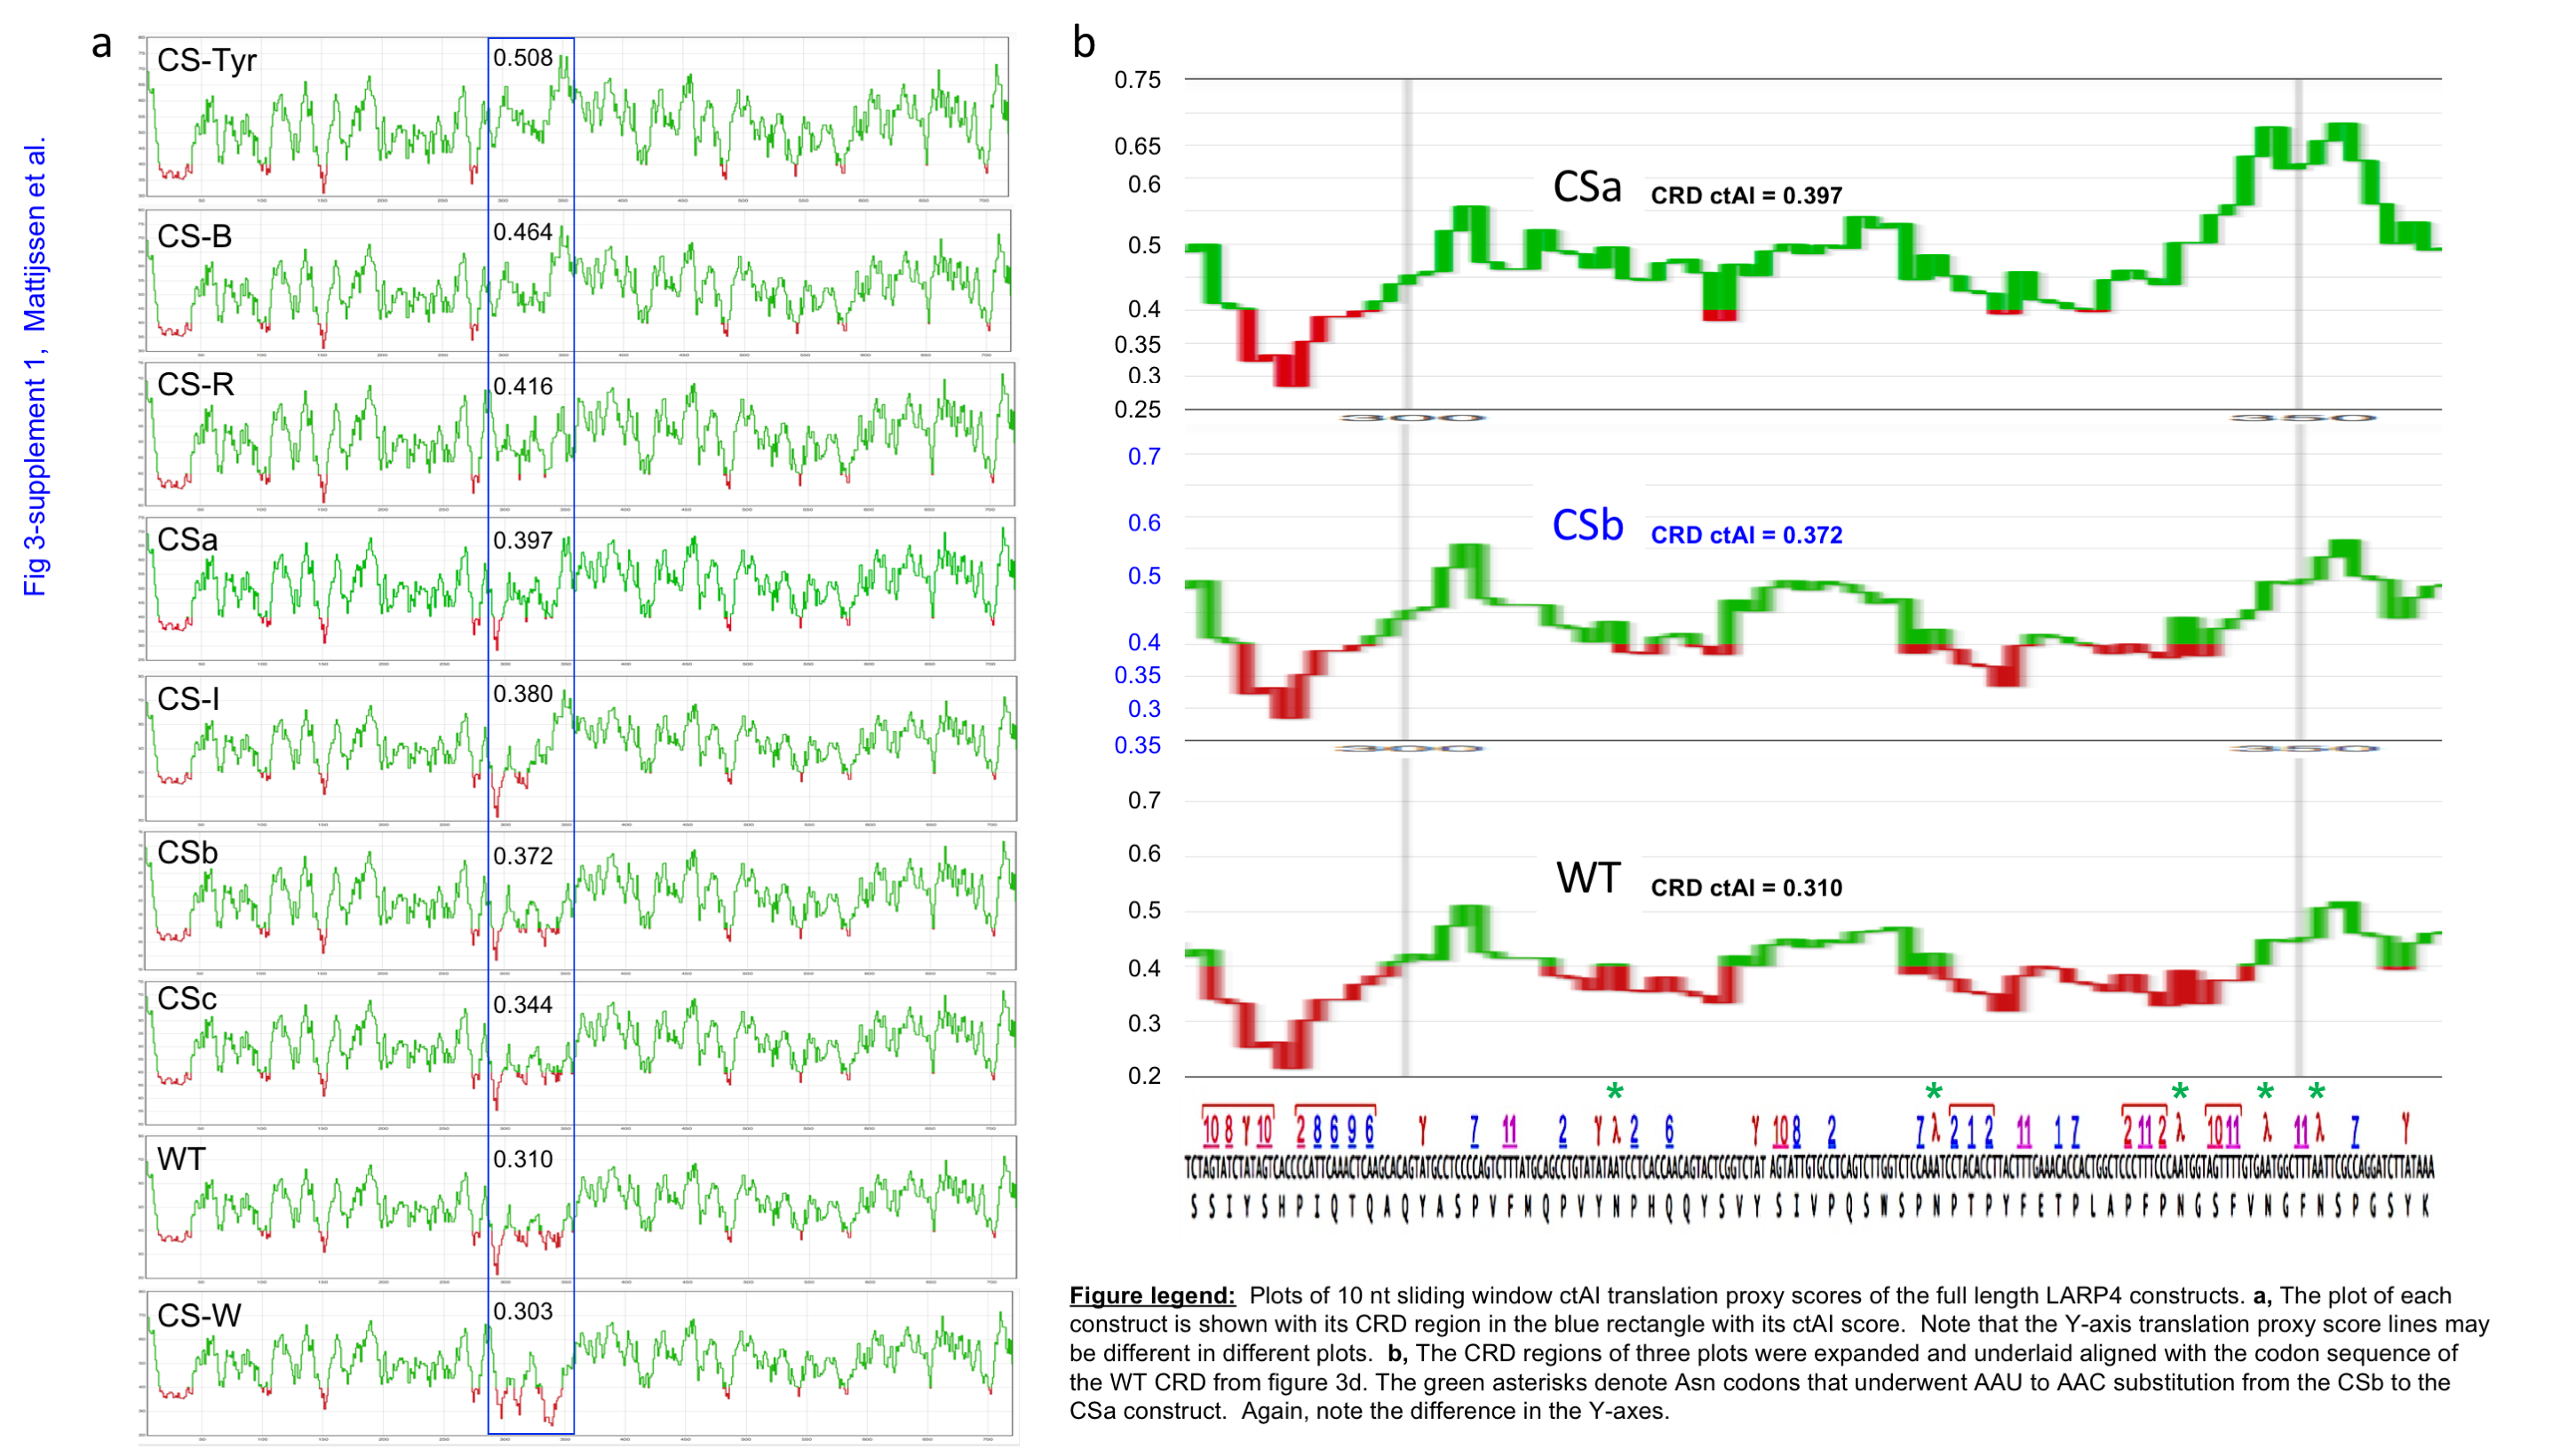

Supplement: supp [file elife-28889-supp-v1.zip › elife_poa_e28889_Figure_3_supplement_2.tif]
